# Supplementary material
Source: publisher figshare collection journal article supplement (https://acs.figshare.com/ndownloader/files/17999819)
Supplement: Supplementary file 1 [file 17999819]

## Sheet: 2A, Down>2x, p<0.05
Supplemental Dataset 2A: Downregulated gene expression tables of DosR mutant treated HC104A compared to DMSO
Gene	Counts per million (CPM)				DosR DMSO/DosR HC104A
	DosR_DMSO1	DosR_DMSO2	DosR_HC104A1	DosR_HC104A2	Fold change	log2 Fold change	logCPM	Adjusted p-value	Gene name	Annotated function
MT0018	583.175	924.59	317.93	358.401	0.448583	-1.15655	9.11619	0.0326255		serine/threonine protein kinase
MT0102	60.6014	85.8742	41.7862	31.2371	0.498926	-1.0031	5.8532	0.00557512		hypothetical protein
MT0149	289.533	262.63	126.449	145.917	0.493252	-1.0196	7.82704	0.00232434		hypothetical protein
MT0190	177.575	265.057	90.73	99.8871	0.430742	-1.2151	7.26192	0.000237762		hypothetical protein
MT0191	416.838	617.126	228.222	235.751	0.448774	-1.15594	8.48139	0.00106981	sigG	DNA-directed RNA polymerase sigma-70 factor
MT0209	107.004	95.5844	55.5559	41.4341	0.478811	-1.06247	6.27771	0.00131977		hypothetical protein
MT0210	169.418	139.659	79.6188	72.1686	0.491062	-1.02602	6.9912	0.000795436		hypothetical protein
MT0256	502.333	973.823	282.892	323.143	0.410576	-1.28428	9.11057	0.00439097	fabG-1	3-oxoacyl-ACP reductase
MT0276	239.143	103.701	105.931	43.5166	0.435894	-1.19795	6.91253	0.0363944		allophanate hydrolase
MT0278	237.934	186.01	102.932	85.2379	0.443836	-1.1719	7.40516	0.000151548		iron ABC transporter substrate-binding protein
MT0291	43.8046	128.356	27.1985	34.5404	0.358786	-1.4788	5.8296	0.0261169		PE family protein
MT0328	74.7397	60.6885	33.1972	30.0164	0.466701	-1.09943	5.79392	0.000775353
MT0335	14.0175	8.95156	4.09001	2.80057	0.300104	-1.73647	2.82871	9.0508e-05		hypothetical protein
MT0356	916.754	495.067	145.195	149.148	0.208478	-2.26203	8.50344	7.71132e-10		hypothetical protein
MT0399	257.208	268.395	63.0543	58.453	0.231214	-2.1127	7.63495	2.25974e-13		LuxR family transcriptional regulator
MT0409	153.769	166.666	78.3918	70.876	0.465908	-1.10188	7.07303	0.000252184		hypothetical protein
MT0410	205.308	183.583	103.068	80.3549	0.471683	-1.08411	7.32385	0.000494983		acyl-CoA dehydrogenase
MT0427	29.7871	36.7924	15.8829	10.2688	0.393457	-1.34572	4.56281	0.000201176	thiE	thiamine phosphate synthase
MT0457	193.103	229.327	99.5235	99.6716	0.471596	-1.08438	7.26705	0.0106248		hypothetical protein
MT0458	119.451	200.879	72.8021	72.5276	0.453848	-1.13972	6.73811	0.00260429		PPE family protein PPE10
MT0504	411.884	829.612	304.092	297.363	0.484499	-1.04544	8.86745	0.0338319		D-inositol-3-phosphate glycosyltransferase
MT0515	477.319	574.872	271.031	197.189	0.445036	-1.16801	8.56045	0.00062123		hypothetical protein
MT0546	688.668	873.535	348.196	247.958	0.381638	-1.38972	9.09257	0.000135622	hemL	glutamate-1-semialdehyde 2,1-aminomutase
MT0548	184.221	236.23	91.4117	72.6713	0.390369	-1.35709	7.22937	1.06382e-05		alkyl hydroperoxide reductase
MT0549	76.0689	135.487	49.8299	38.4899	0.417753	-1.25928	6.31116	0.0014315		cytochrome C biogenesis protein CcdA
MT0550	402.519	827.564	226.655	197.62	0.344952	-1.53553	8.695	0.000636091		cytochrome c biogenesis protein
MT0609	101.264	61.523	37.2191	41.865	0.485579	-1.04222	6.24116	0.0084093		hypothetical protein
MT0656	126.097	151.949	70.6208	64.485	0.486045	-1.04084	6.76563	0.000938813		ribonuclease VapC5
MT0673	216.606	174.328	85.1403	90.9827	0.450471	-1.15049	7.21314	0.000353638	mma1	mycolic acid methyltransferase MmaA1
MT0808	103.56	210.968	60.6003	57.5194	0.375716	-1.41229	6.48349	0.000367241		DUF2334 domain-containing protein
MT0845	2538.67	6189.09	1112	1664.26	0.318098	-1.65246	11.4788	0.0207092		tRNA dihydrouridine synthase DusB
MT0846	8520.93	17157.1	3206.97	4862.94	0.314274	-1.66991	13.0704	0.0279248		acyl-ACP desaturase
MT0855	354.062	732.89	198.434	238.479	0.401988	-1.31478	8.84085	0.028761
MT0894	1512.32	4396.12	597.414	470.568	0.18076	-2.46785	10.7666	0.000367241		PE family protein
MT0897	121.444	180.776	75.8696	57.5912	0.441784	-1.17859	6.82195	0.00116855		hypothetical protein
MT0898	195.519	282.733	111.248	115.254	0.473698	-1.07796	7.54186	0.00161978		hypothetical protein
MT0899	844.975	1239.87	464.897	418.362	0.423674	-1.23897	9.66371	0.00635197		MFS transporter
MT0908	2585.07	5550.72	646.221	1476.19	0.260874	-1.93857	11.9186	0.00762488		hypothetical protein
MT0909	284.941	663.932	106.954	225.123	0.349989	-1.51462	8.98988	0.0130636		ferredoxin/ferredoxin--NADP reductase
MT0911	110.75	102.867	26.9259	30.8063	0.270252	-1.88762	6.80827	6.33942e-11		hypothetical protein
MT0912	293.34	284.933	131.153	103.262	0.405407	-1.30256	7.87321	2.76276e-05	gltA-1	citrate synthase/methylcitrate synthase
MT0940	39.2731	78.2882	17.3144	24.3434	0.354562	-1.49589	5.29725	0.00619722		PPE family protein
MT0941	33.1706	56.9713	10.7022	19.604	0.336365	-1.5719	4.98172	0.00539577		PE family protein
MT0994	204.643	179.031	100.478	82.8682	0.477878	-1.06529	7.25168	0.00047435		hypothetical protein
MT1001	663.292	1299.34	177.438	317.111	0.251989	-1.98857	9.68996	0.0138894	bccA-1	acetyl/propionyl-CoA carboxylase subunit alpha
MT1002	523.178	875.28	83.9133	190.223	0.196035	-2.35082	9.15375	0.00449109	pccB-1	acetyl-CoA carboxylase carboxyltransferas
MT1003	303.43	628.278	60.1231	107.858	0.180307	-2.47147	8.49282	0.00120499		acyl-CoA dehydrogenase FadE13
MT1003.1	915.969	1713.62	133.334	272.015	0.154153	-2.69756	10.0078	0.000884121		hypothetical protein
MT1009	175.581	153.163	81.2548	78.6314	0.486339	-1.03997	7.22413	0.00172311		DNA-binding response regulator
MT1093	181.804	192.383	100.751	84.2326	0.49443	-1.01616	7.33258	0.00128497		patatin family protein
MT1095	275.334	330.449	68.7803	73.892	0.235546	-2.08592	7.68766	2.1765e-09		cysteine dioxygenase
MT1096	10.6339	16.9169	3.61284	4.30857	0.288221	-1.79475	3.57848	0.00202867		hypothetical protein
MT1105	239.807	431.192	115.884	111.377	0.338745	-1.56173	8.01646	0.000367241		hypothetical protein
MT1106	145.129	310.573	54.2608	93.7833	0.324908	-1.6219	7.74002	0.019693		esterase
MT1115	142.712	288.27	90.2528	101.251	0.444436	-1.16995	7.22789	0.01907		hypothetical protein
MT1124	264.58	246.851	98.2283	93.8551	0.375592	-1.41276	7.56273	6.75615e-07	panK	type I pantothenate kinase
MT1127	2006.67	2401.67	1019.23	940.777	0.444618	-1.16936	10.6665	0.0130707		ATP-binding protein
MT1168	91.7781	157.487	52.4203	58.453	0.444957	-1.16826	6.40814	0.00731685		PPE family protein
MT1210	759.843	710.131	290.731	252.195	0.369352	-1.43693	9.18894	3.58143e-05		FO synthase
MT1215	467.772	967.527	322.565	357.827	0.474073	-1.07682	8.95264	0.0291863		succinyldiaminopimelate transaminase
MT1263	57.0366	66.2263	31.5612	25.9232	0.466646	-1.0996	5.53124	0.000809049		haloacid dehalogenase
MT1264	109.723	145.652	37.3554	31.3808	0.269305	-1.89269	6.47069	2.98857e-09		hypothetical protein
MT1280.1	25.9806	53.7093	14.8604	15.2236	0.378028	-1.40344	4.75957	0.00306137		PE family protein
MT1283	444.692	530.342	171.167	215.716	0.396802	-1.33351	8.61892	0.000189311		short-chain type dehydrogenase/reductase
MT1296	776.398	441.054	256.784	191.875	0.368513	-1.44021	8.50637	0.000247085		oxidoreductase
MT1297	370.194	173.114	40.3547	37.1255	0.142609	-2.80986	7.02527	2.25974e-13	tap	multidrug-efflux transporter
MT1327	156.73	142.087	60.9411	56.3705	0.392601	-1.34886	6.84072	7.12764e-06		hypothetical protein
MT1364	2185.88	1962.97	1078.67	871.552	0.470066	-1.08907	10.6777	0.0243167		methylmalonyl-CoA epimerase
MT1452	565.109	519.114	255.353	189.649	0.410449	-1.28472	8.6493	0.000149707	rpe	ribulose-phosphate 3-epimerase
MT1453	127.426	146.259	67.0079	55.5088	0.447785	-1.15912	6.86607	0.000237762	ribD	bifunctiona
MT1515	65.7371	86.4811	36.8782	37.0537	0.48588	-1.04133	6.53185	0.0165968		metal-transporting ATPase
MT1524	149.117	292.291	91.7525	99.5998	0.433608	-1.20554	7.51471	0.00635197
MT1545	468.8	922.465	203.751	230.437	0.312104	-1.6799	8.90423	0.000338742		esterase
MT1567	25.8598	75.6331	8.45268	6.39105	0.146547	-2.77057	4.64118	1.92668e-06		membrane protein
MT1573	478.165	850.246	272.872	311.869	0.440207	-1.18374	8.81484	0.0122623		transporter MmpL12
MT1591	446.565	445.681	182.687	167.532	0.39253	-1.34913	8.33851	2.413e-05	lspA	lipoprotein signal peptidase
MT1592	412.911	463.281	194.071	156.186	0.399786	-1.3227	8.34477	4.23814e-05		RNA pseudouridine synthase
MT1672	489.947	587.389	241.106	246.522	0.452647	-1.14354	9.08104	0.00110302		universal stress protein
MT1683	244.097	309.891	132.039	142.183	0.495047	-1.01436	8.10897	0.00545817		hypothetical protein
MT1690	215.398	557.652	172.326	192.593	0.472114	-1.08279	7.88748	0.04324	argC	N-acetyl-gamma-glutamyl-phosphate reductase
MT1691	185.308	386.965	113.225	157.119	0.472468	-1.08171	7.57048	0.0349175	argJ	bifunctional glutamate N-acetyltransferase/amino
MT1692	212.558	400.392	125.631	141.896	0.436528	-1.19586	7.52069	0.00635197	argB	acetylglutamate kinase
MT1693	155.401	388.558	129.79	130.262	0.478167	-1.06441	7.43653	0.0447885	argD	aspartate aminotransferase family protein
MT1763	138.604	99.9843	59.4414	50.2667	0.459749	-1.12108	6.66852	0.000619212		biotin carboxylase
MT1823	149.479	312.849	75.597	123.082	0.429791	-1.21829	7.27664	0.0340466		transcription antitermination regulator
MT1836	52.5051	81.0192	28.1529	27.0722	0.413945	-1.27249	5.71139	0.000367241		PPE family protein
MT1839	36.9167	43.9233	14.0424	15.7263	0.368475	-1.44036	4.93933	2.07616e-05		PPE family protein PPE27
MT1882	37.823	43.4681	17.7234	17.8088	0.437351	-1.19314	5.05897	0.00113914		hydrolase
MT1918	507.65	495.825	230.267	252.626	0.481221	-1.05523	8.48631	0.00114785		reductase
MT1974	532.241	424.668	215.543	218.516	0.453591	-1.14054	8.59686	0.000726461		esterase
MT2028	58.3054	41.1923	25.5625	15.08	0.408536	-1.29147	5.25092	0.00172311		hypothetical protein
MT2042	389.951	204.293	103.068	93.7114	0.331103	-1.59465	7.56848	1.20686e-05		23S rRNA (adenine(2058)-N(6))-methyltransferas
MT2060	248.387	381.2	105.727	134.499	0.381594	-1.38989	7.77735	0.00684168		hypothetical protein
MT2061	154.071	178.879	70.3481	78.2724	0.446426	-1.16351	6.94662	0.00114785		universal stress protein
MT2134	584.081	550.9	290.663	253.559	0.479507	-1.06037	8.79198	0.00164152		PPOX class F420-dependent enzyme
MT2207	128.211	158.169	70.4163	68.3627	0.484714	-1.04479	6.78906	0.00159055		YggS family pyridoxal phosphate enzyme
MT2209	1504.88	2308.59	986.714	735.976	0.451748	-1.14641	10.3604	0.0161838	ftsZ	cell division protein FtsZ
MT2211	247.843	562.052	167.758	190.798	0.442771	-1.17537	8.23803	0.0262847	murC	UDP-N-acetylmuramate--L-alanine ligase
MT2215	268.628	303.746	97.8875	117.193	0.375788	-1.41201	7.85004	0.00188947		phospho-N-acetylmuramoyl-pentapeptide
MT2216	234.853	368.228	95.2972	87.0332	0.302382	-1.72555	7.82324	0.000129361	murF	UDP-N-acetylmuramoyl-tripeptide--D-alanyl-D
MT2217	349.47	658.243	197.411	176.005	0.370597	-1.43208	8.82842	0.00274947		UDP-N-acetylmuramoyl-L-alanyl-D-glutamate--2, 6
MT2218	469.343	928.231	122.223	99.0254	0.158328	-2.65901	9.21481	6.67804e-07		hypothetical protein
MT2218.1	225.065	353.966	78.1873	58.1657	0.235553	-2.08588	8.01045	9.10468e-08		hypothetical protein
MT2242	572.964	612.575	264.76	291.978	0.469616	-1.09045	9.04588	0.00429115		long-chain-fatty-acid--CoA ligase FadD15
MT2243	220.594	324.38	128.699	141.465	0.495827	-1.01209	7.61495	0.00183179		GDP-mannose-dependent alpha-(1-6)
MT2247	47.4902	97.3292	33.6062	36.9101	0.48726	-1.03723	5.8643	0.028764		hypothetical protein
MT2248	139.812	189.955	72.4613	55.2215	0.387337	-1.36834	7.08387	6.33885e-05
MT2249	1482.17	1460.54	570.079	691.454	0.428698	-1.22197	10.2452	0.0057435	ctaE	cytochrome c oxidase subunit 3
MT2250	2406.05	3048.76	1275.4	1089.49	0.433547	-1.20574	11.1135	0.0168488		ubiquinol-cytochrome c reductase cytochrome
MT2251	1981.78	2197	996.667	1032.98	0.485706	-1.04184	10.8389	0.0308922		menaquinol-cytochrome C reductase iron-sulfu
MT2321	192.74	121.529	82.4136	64.7004	0.468042	-1.09529	7.0325	0.00233245		hypothetical protein
MT2378	332.492	347.138	184.664	145.486	0.485821	-1.0415	7.94653	0.000636091		hypothetical protein
MT2413	280.531	581.32	194.343	172.63	0.425852	-1.23158	8.26085	0.011795
MT2428	293.038	341.145	142.128	157.622	0.472684	-1.08105	8.09759	0.00207517	fur-2	transcriptional repressor
MT2489	329.35	193.9	64.8948	60.3918	0.23942	-2.06239	7.12639	4.9225e-10		hypothetical protein
MT2525	348.926	460.095	193.662	156.904	0.43338	-1.2063	8.1531	0.000257635		enoyl reductase
MT2529	1436.37	1827.26	734.429	873.922	0.492817	-1.02088	10.4339	0.0319288		2-oxoacid:ferredoxin oxidoreductase subuni
MT2530	3497.18	4405.38	1503.15	1817	0.420137	-1.25107	11.5974	0.0273796		2-oxoglutarate ferredoxin oxidoreductase subuni
MT2568	131.414	100.364	46.1489	43.6602	0.387431	-1.36799	6.5264	2.69089e-05		antitoxin
MT2569	321.435	267.712	136.265	84.3762	0.374539	-1.41681	7.8139	0.000251916		ribonuclease
MT2634	923.159	1120.01	152.83	155.396	0.150865	-2.72867	9.95124	6.56182e-09		hypothetical protein
MT2635	592.842	732.435	201.092	211.479	0.311324	-1.68351	9.13465	1.51229e-05		hypothetical protein
MT2655	53.1093	103.701	40.6274	26.9286	0.431224	-1.21349	5.95743	0.00426322		radical SAM protein
MT2692	124.888	170.459	62.0318	68.5063	0.442076	-1.17763	6.994	0.00319181		hypothetical protein
MT2716	64.287	89.0604	27.7439	24.8461	0.343196	-1.54289	6.12163	9.11947e-06		hypothetical protein
MT2751	106.823	165.756	54.1244	56.4423	0.405779	-1.30123	6.70695	0.000473655	hemG	protoporphyrinogen oxidase
MT2752	345.663	485.281	173.825	148.933	0.388478	-1.36409	8.2416	6.33885e-05	hemE	uroporphyrinogen decarboxylase
MT2786	315.393	234.789	97.0695	95.2194	0.349474	-1.51674	7.72446	5.20372e-07		NAD(P)(+) transhydrogenase
MT2797	1063.76	703.456	350.718	327.38	0.383701	-1.38194	9.12331	0.00016317	hflX	ATP-binding protein
MT2850	1213.96	610.83	295.162	152.38	0.245263	-2.0276	9.13827	0.000251916	ald	alanine dehydrogenase
MT2912	1054.69	3519.02	486.847	866.238	0.295844	-1.75709	10.3693	0.0259181	efpA	MFS-type transporter EfpA
MT2933	362.339	387.193	178.324	166.167	0.459637	-1.12143	8.11058	0.000244493		penicillin-binding protein
MT2962	76.5523	120.315	43.5586	53.0672	0.490996	-1.02622	6.36813	0.0153699	xerC	tyrosine recombinase XerC
MT3073	464.691	536.411	186.641	154.965	0.341261	-1.55105	8.36698	1.4793e-06
MT3074	363.306	405.399	157.806	128.108	0.371986	-1.42668	8.06174	2.43164e-06	serA	D-3-phosphoglycerate dehydrogenase
MT3087	36.2521	28.827	16.0192	16.4444	0.498591	-1.00407	4.90747	0.00684296		oxidoreductase
MT3088	112.865	107.722	42.3316	41.0032	0.377819	-1.40423	6.4967	2.37516e-06		hypothetical protein
MT3090	433.635	323.242	180.233	171.912	0.465233	-1.10397	8.25573	0.000798195	pfkA	ATP-dependent 6-phosphofructokinase
MT3110	9.0026	16.8411	6.54401	4.88305	0.44425	-1.17056	3.28449	0.0113029		1-acyl-sn-glycerol-3-phosphate acyltransferase
MT3134	1264.71	1966.76	590.529	860.853	0.449145	-1.15475	10.4851	0.0262847		monooxygenase
MT3165	674.53	903.88	235.789	243.363	0.30358	-1.71985	9.11135	6.89696e-05		serine/threonine-protein kinase PknK
MT3168	214.431	313.835	125.495	103.118	0.432869	-1.208	6.86909	0.000263956		FAD-containing monooxygenase MymA
MT3169	43.5629	78.0606	28.8345	24.128	0.435905	-1.19791	4.79501	0.0040858	bah	acetylhydrolase
MT3170	56.7949	91.9431	34.5606	28.5084	0.424389	-1.23654	4.98244	0.00104385		acetoin dehydrogenase
MT3171	270.38	402.289	110.021	105.704	0.320753	-1.64046	7.60876	6.07484e-06		alcohol dehydrogenase
MT3172	212.679	384.082	113.225	94.8604	0.348765	-1.51967	7.54017	0.000403708		wax ester/triacylglycerol synthase family O
MT3173	206.697	329.008	107.772	77.0516	0.345098	-1.53492	7.26956	0.000129361		diacylglycerol O-acyltransferase
MT3174	182.71	275.298	115.406	106.206	0.483977	-1.04699	7.26381	0.00334196		long-chain-fatty-acid--CoA ligase FadD13
MT3183	820.082	804.426	344.788	357.899	0.432557	-1.20904	9.27709	0.000723533		hypothetical protein
MT3305	445.236	930.886	321.952	326.805	0.471476	-1.08474	9.00666	0.0191691		hypothetical protein
MT3342	797.122	1381.12	467.351	501.087	0.444611	-1.16938	9.60666	0.0259181		hypothetical protein
MT3343	1098.01	1554.38	653.038	579.647	0.464756	-1.10546	9.91079	0.0158234	mtrB	two-component sensor histidine kinase
MT3376	287.479	312.773	143.082	142.327	0.475515	-1.07244	7.8091	0.000248226	purK	5-(carboxyamino)imidazole ribonucleotid
MT3441	334.365	453.495	120.655	155.109	0.350041	-1.5144	8.37295	2.82465e-05		alpha/beta hydrolase
MT3463	30.0892	28.5236	15.2694	11.3459	0.454388	-1.138	4.53357	0.000877775		hypothetical protein
MT3464	310.801	457.44	196.866	120.137	0.412712	-1.27679	8.05547	0.000636091	folD	bifunctional methylenetetrahydrofolat
MT3476	126.157	257.319	61.8954	55.2933	0.305697	-1.70982	6.91664	0.000251916		PE family protein
MT3498	122.955	145.046	63.0543	66.9983	0.485365	-1.04286	6.98306	0.000825085		short chain dehydrogenase
MT3514	214.129	358.897	67.6214	76.0463	0.250764	-1.9956	7.55143	1.3139e-06		taurine catabolism dioxygenase
MT3536	52.9884	40.5854	20.041	19.9631	0.427329	-1.22658	5.24231	0.000198392
MT3606	146.579	192.989	84.595	62.7615	0.434099	-1.2039	7.01758	0.000387313	fabG-3	3-ketoacyl-ACP reductase
MT3607	111.173	145.425	27.7439	37.7718	0.25537	-1.96934	6.67071	8.47724e-06	fdxD	ferredoxin FdxD
MT3614	125.916	136.322	63.9404	65.8493	0.494997	-1.01451	6.58864	0.00107251		hypothetical protein
MT3726	351.464	304.96	143.423	140.316	0.43224	-1.21009	8.00145	6.21559e-05	hpt	hypoxanthine-guanine phosphoribosyltransferase
MT3748	757.729	1227.73	464.011	486.151	0.478581	-1.06317	9.68986	0.0152432		adenylate/guanylate cyclase domain-containin
MT3814	680.633	828.702	226.109	218.445	0.294552	-1.76341	9.02553	7.07123e-07		DNA polymerase III subunit epsilon
MT3850	74.0751	33.9097	21.5407	21.1838	0.395409	-1.33858	5.23754	0.00415083		oxidoreductase
MT3861	116.852	106.508	54.6698	47.8252	0.458901	-1.12375	6.58046	0.000249795	tyrA	prephenate dehydrogenase
MT3883	628.369	525.487	311.25	243.291	0.4806	-1.05709	8.97734	0.00307448		enoyl-CoA hydratase
MT3949	13983.3	18454	5608.22	6508.67	0.373549	-1.42063	13.7639	0.0440564		ferritin BfrB
MT3969	1986.49	3549.14	1062.72	1133.66	0.396775	-1.33361	11.1589	0.0355142		FAD-containing monooxygenase EthA

## Sheet: 2B, Up>2x, p<0.05
Supplemental Dataset 2B: Upregulated gene expression tables of DosR mutant treated with HC104A compared to DMSO
Gene	Counts per million (CPM)				DosR DMSO/DosR HC104A
	DosR_DMSO1	DosR_DMSO2	DosR_HC104A1	DosR_HC104A2	Fold change	log2 Fold change	logCPM	Adjusted p-value	Gene name	Annotated function
MT0007	162.591	194.886	325.633	398.112	2.02477	1.01776	7.83381	0.00141126		membrane protein
MT0033	3.26269	3.64131	9.61152	6.17562	2.28994	1.19531	2.20522	0.00954688
MT0067	135.764	175.238	306.887	318.188	2.01018	1.00733	7.78384	0.00319181	celA	1,4-beta-glucanase
MT0074	19.9991	21.3927	42.8769	44.5937	2.11339	1.07956	5.44736	0.00415397		short-chain dehydrogenase
MT0124	26.4036	11.3791	24.8809	62.4743	2.30674	1.20585	4.71435	0.03407		hypothetical protein
MT0128	172.439	143.832	330.336	387.341	2.26877	1.18191	7.75454	0.000173561	fusA-1	elongation factor G-like protein
MT0200	241.983	240.478	563.194	784.232	2.79272	1.48167	8.6168	8.08641e-06		hypothetical protein
MT0201	70.2686	84.5088	177.711	200.636	2.44495	1.28981	6.90764	5.93028e-05		MFS transporter
MT0205	3.50437	2.35168	6.95301	6.82191	2.33195	1.22154	1.99296	0.0102815		helix-turn-helix transcriptional regulator
MT0206	37.4	60.3851	106.681	152.38	2.65105	1.40656	6.29061	0.000235352		transcriptional regulator
MT0207	196.426	309.132	460.126	579.216	2.05613	1.03993	8.35001	0.00439097		molybdopterin oxidoreductase
MT0294	2.17512	1.89652	3.88551	5.09848	2.19282	1.13278	1.79448	0.0255529
MT0385	14.4404	12.5929	40.7637	36.8383	2.86711	1.5196	4.28625	3.00015e-05		oxidoreductase
MT0434	65.4954	32.7718	98.8418	101.467	2.03651	1.0261	5.99347	0.0318446		hypothetical protein
MT0569	12.6278	12.4411	23.1085	30.7345	2.14626	1.10183	4.14198	0.00210691
MT0614	3.62521	4.6275	10.9067	7.68362	2.25996	1.1763	2.42071	0.00826782
MT0693	7.61293	4.93094	13.7697	13.7156	2.17963	1.12409	3.02039	0.00995266
MT0696	2023.65	1055.75	3308	4075.84	2.39776	1.26169	11.0471	0.0251002	rpoC	DNA-directed RNA polymerase subunit beta'
MT0718	134.012	140.266	282.619	296.214	2.11041	1.07753	7.53779	0.000231084		hypothetical protein
MT0726	2.29596	1.21377	4.63534	5.2421	2.77124	1.47053	1.60861	0.011004
MT0776	40.9044	68.8056	96.3878	167.819	2.40935	1.26865	6.29162	0.00439097		acyl-CoA dehydrogenase FadE9
MT0777	64.5891	125.701	158.829	269.07	2.24938	1.16953	7.05101	0.0161838	mmsA	methylmalonate-semialdehyde dehydrogenase (Co
MT0805	345.603	284.705	616.705	705.457	2.09746	1.06865	8.6832	0.00183179	ptrB	protease
MT0869	98.4848	121.301	229.109	250.615	2.18309	1.12637	7.25491	0.000367241		oxidase
MT0873	9.54638	9.255	27.8802	25.636	2.84417	1.50801	3.92072	1.54539e-05		transposase
MT0910.2	2.1147	3.18615	6.06684	8.61714	2.78652	1.47846	2.11548	0.000775353
MT0910.3	3.98773	3.71717	9.33885	6.96553	2.11261	1.07903	2.40401	0.0114912
MT0914	142.833	121.225	282.142	293.701	2.18031	1.12453	7.41782	0.000251916		LuxR family transcriptional regulator
MT0915	138.12	121.908	283.233	306.77	2.26864	1.18183	7.40499	0.0002561		adenylate/guanylate cyclase domain-containin
MT0915.1	10.2714	8.11709	19.223	19.7476	2.11414	1.08007	3.46688	0.00855507
MT0916	224.582	161.507	375.19	422.168	2.06479	1.04599	7.77381	0.00266764
MT0947	83.4402	64.9367	165.986	152.523	2.14573	1.10147	6.62434	0.00108208		IS256 family transposase
MT0990	5.13571	4.17234	12.0655	9.33524	2.29092	1.19593	2.78312	0.00410365		hypothetical protein
MT1026	40.844	23.7444	80.9821	64.5568	2.25011	1.16999	5.62228	0.00306137
MT1054.1	50.9946	33.6821	110.703	105.416	2.55003	1.35051	5.82018	0.000623402
MT1065	15.105	17.0686	31.6976	47.5379	2.46314	1.3005	4.48522	0.000368333
MT1075.1	434.36	339.097	966.809	782.437	2.26146	1.17725	9.03069	0.0033015		hypothetical protein
MT1112	15.6488	25.3375	46.9669	39.6389	2.11658	1.08174	5.08297	0.00889866		membrane protein
MT1160	108.635	172.811	307.364	326.231	2.25184	1.17111	7.52097	0.00116855		hypothetical protein
MT1205	188.692	115.46	320.929	305.765	2.05991	1.04258	7.79938	0.0137124		PPE family protein PPE17
MT1206	83.5006	39.4475	164.759	149.723	2.55647	1.35415	6.70471	0.0241347		PE family protein
MT1207	101.325	68.9573	383.165	362.207	4.37511	2.12932	7.37939	5.47498e-10		1D-myo-inositol 2-acetamido-2-deoxy-alpha-D
MT1211	1097.35	848.501	1960.89	2017.13	2.04431	1.03162	10.4488	0.0264518		hemophore-related protein
MT1216	15.8905	11.7584	46.2852	45.7427	3.32177	1.73195	4.66069	1.3335e-05
MT1217	64.5287	60.9161	194.48	178.734	2.97467	1.57273	6.67303	3.58143e-05
MT1218	435.689	276.664	1553.73	2013.68	5.00742	2.32407	9.82461	1.06211e-07
MT1219	210.262	166.287	1018.75	1373.79	6.35293	2.66742	9.19834	2.25974e-13		acyltransferase
MT1220	121.867	76.1641	443.561	565.213	5.09181	2.34818	7.95244	1.36989e-09		transporter MmpL10
MT1221	74.9814	54.0128	406.138	510.494	7.10292	2.82841	7.69109	6.33942e-11		PE-PPE domain-containing protein
MT1222	437.623	312.546	1180.78	1384.56	3.41943	1.77376	9.39916	4.10106e-05		acyl-CoA synthetase
MT1237	10.5131	12.0618	22.495	24.5589	2.08595	1.06071	3.92553	0.00228896		IS256 family transposase
MT1238	78.0628	54.3162	167.009	165.162	2.50793	1.3265	6.6176	0.000678038		MFS transporter
MT1389	17.2802	14.8687	45.1264	44.0192	2.76958	1.46967	4.76425	2.76276e-05		lysine N-acyltransferase MbtK
MT1394	68.0935	76.8468	151.467	207.386	2.47605	1.30804	6.70907	7.30909e-05		hypothetical protein
MT1396	11.6007	9.10328	22.7677	24.7743	2.2905	1.19566	3.76872	0.00149454		TetR family transcriptional regulator
MT1398	23.8659	22.303	58.6234	56.3705	2.48946	1.31583	4.95831	8.08391e-05		molybdopterin biosynthesis protein MoeY
MT1399	6.46495	4.09647	9.81602	12.064	2.05796	1.04121	2.83853	0.0194925		hypothetical protein
MT1418	59.9972	65.316	110.635	140.603	2.00496	1.00357	6.31771	0.00264941		sulfotransferase
MT1430	73.1083	89.3638	381.529	404.431	4.83867	2.27461	7.35423	3.75182e-15		cell motility protein
MT1431	1062.79	1159.61	3450.33	3963.6	3.33601	1.73812	10.7462	0.000107838		PPE family protein PPE20
MT1435	718.758	670.76	1533.82	2337.97	2.78638	1.47839	10.042	0.000367241		DNA-directed RNA polymerase subunit omega
MT1436	510.671	613.03	1374.72	1938.35	2.9484	1.55993	9.73984	9.50264e-05	dfp	phosphopantothenate synthase
MT1447	9.24428	11.6825	36.8782	31.4526	3.27074	1.70962	4.30681	5.82352e-07		methyltransferase
MT1449	41.3878	49.8404	82.55	109.294	2.1031	1.07252	6.23786	0.0345626		methyltransferase
MT1569	1.8126	2.1241	5.99868	8.90438	3.78526	1.92039	2.3359	3.82937e-05		hypothetical protein
MT1579	3.68563	3.64131	11.2475	10.8432	3.01011	1.58981	2.62622	3.82937e-05		polyketide synthase
MT1586	451.459	279.926	544.039	931.585	2.01736	1.01247	9.01658	0.0289573		hypothetical protein
MT1668	122.23	88.8328	259.988	173.851	2.05501	1.03915	7.24136	0.0147658		hypothetical protein
MT1676	51.7196	40.5096	91.4117	95.2913	2.02305	1.01653	6.12773	0.00442589		hypothetical protein
MT1678	183.556	150.583	368.101	405.293	2.31415	1.21048	7.88681	9.50264e-05		lysine--tRNA ligase
MT1703	60.9035	57.0472	126.04	116.906	2.05934	1.04218	6.23262	0.00113914		polyketide synthase
MT1704	53.8343	53.9369	109.68	113.531	2.07099	1.05032	6.10971	0.000619212		polyketide synthase
MT1722	9.84848	6.97918	18.6095	21.3274	2.36569	1.24226	3.67086	0.00580123		coiled-coil structural protein
MT1746.1	9.18386	6.59988	31.0159	36.3356	4.24936	2.08725	4.03597	7.54998e-09
MT1760	2.53764	1.44135	6.13501	2.94419	2.25638	1.17401	1.75774	0.0384903		hypothetical protein
MT1770	68.8789	55.4541	163.123	149.938	2.51687	1.33163	6.40762	0.000129361		SAM-dependent methyltransferase
MT1774	2.7189	2.65512	5.72601	5.09848	2.01089	1.00783	1.93928	0.0261169		hypothetical protein
MT1779	4.10857	2.57926	7.43018	7.10914	2.15363	1.10677	2.30063	0.0144393	narK-3	nitrate reductase subunit gamma
MT1813	26.2223	33.758	60.4639	63.2642	2.06444	1.04575	5.33077	0.00172311
MT1861	9.3047	6.37229	17.6552	15.4391	2.10201	1.07177	3.42563	0.00612944		hypothetical protein
MT1863	156.79	117.887	317.112	315.316	2.30175	1.20273	7.56728	0.000102319		hypothetical protein
MT1924.1	26.464	41.8751	123.177	155.899	4.08642	2.03084	6.85793	1.94798e-06
MT1932	518.405	325.821	1260.4	976.107	2.64896	1.40542	9.36935	0.000798195
MT2001	15.2863	10.3929	29.448	26.2105	2.16117	1.11182	4.20767	0.00290626
MT2007	18.8511	10.9998	28.63	35.6175	2.14509	1.10104	4.44934	0.00506451
MT2015.1	14.1383	21.5444	41.1727	44.3783	2.40204	1.26426	4.58164	0.000469803
MT2058	65.8579	64.7091	117.86	156.545	2.10133	1.0713	6.54712	0.00160728		3-alpha(or 20-beta)-hydroxysteroi
MT2063	29.9684	33.4545	66.5989	75.5436	2.24169	1.16459	5.36484	0.000251916	fdxA	ferredoxin
MT2083	6.94831	5.31024	25.4262	16.8034	3.4326	1.7793	3.52953	8.52437e-06
MT2084	81.9297	80.4123	308.523	160.279	2.88763	1.52989	7.23381	0.000458854		cation transporter
MT2092	12.084	13.6549	26.5169	27.7185	2.1085	1.07621	4.14367	0.00141562
MT2139	7.55251	5.91713	12.4064	17.5933	2.21846	1.14956	3.27258	0.00383057		hypothetical protein
MT2161	397.504	433.771	868.513	887.638	2.11262	1.07904	9.09456	0.0016506		helicase HelZ
MT2162	147.969	146.563	384.938	389.423	2.62901	1.39452	7.87947	1.3139e-06		hypothetical protein
MT2182.1	2.83975	1.74479	4.83984	4.59581	2.0331	1.02368	2.01239	0.0376448
MT2314	16.0113	15.5514	40.0821	39.2798	2.51321	1.32953	4.51393	0.000113426
MT2336	95.0408	89.3638	176.62	208.032	2.08559	1.06046	6.97408	0.00077276		cytochrome P450
MT2391	177.575	63.1919	315.817	363.284	2.81954	1.49546	7.65099	0.0108892	narK-4	MFS transporter
MT2393	53.0489	26.3236	117.997	111.377	2.88756	1.52985	6.21213	0.0106248
MT2394	81.0838	65.3919	148.808	162.577	2.12493	1.08742	6.63274	0.000690718	sfcA	NAD-dependent malic enzyme
MT2445.1	34.4999	44.2268	74.6426	116.69	2.43108	1.2816	6.37313	0.00114785	mbtH	protein mbtH
MT2448	201.622	213.548	401.025	541.731	2.27076	1.18317	8.50525	0.000367241		non-ribosomal peptide synthetase
MT2449	41.6295	36.0338	75.8015	99.3844	2.25429	1.17267	6.36669	0.000305199		polyketide synthase
MT2450	24.6514	27.9167	52.4884	78.6314	2.49468	1.31886	5.88939	9.50264e-05		polyketide synthase
MT2451	67.7309	86.026	155.216	233.022	2.52541	1.33652	7.53347	0.000469803	pchE	phenyloxazoline synthase MbtB
MT2452	14.2591	14.3377	29.448	34.5404	2.23673	1.16139	4.78695	0.00141562	entE	2,3-dihydroxybenzoate-AMP ligase
MT2454	9.78806	11.6825	29.2435	42.9421	3.36416	1.75025	4.9195	1.88155e-06		salicylate synthase
MT2485	185.731	161.128	448.469	356.965	2.32182	1.21526	7.9433	0.000129361	rpsT	30S ribosomal protein S20
MT2505	284.881	181.003	676.01	818.701	3.20783	1.6816	8.50294	0.000107838		PPE family protein
MT2506	93.8928	55.8334	256.784	226.703	3.22739	1.69037	6.90254	6.21559e-05		PE family protein
MT2509	89.5426	73.8124	154.943	179.811	2.04853	1.03459	6.75584	0.00189412		adenylate/guanylate cyclase domain-containin
MT2566	3.26269	2.1241	5.45334	5.74476	2.05719	1.04067	1.90183	0.0271337		hypothetical protein
MT2567	5.01487	6.37229	10.3614	13.0693	2.06235	1.04429	3.0555	0.00729337		hypothetical protein
MT2587	10.3923	11.455	21.4044	22.6918	2.01931	1.01386	3.85545	0.00411063		IS256 family transposase
MT2588	48.2152	32.7718	120.451	116.331	2.92121	1.54657	5.94126	0.000107838		hypothetical protein
MT2589	54.1968	36.3372	122.223	132.776	2.81398	1.49261	6.19029	3.82937e-05		hypothetical protein
MT2589.1	25.4973	21.9237	63.6678	74.2511	2.90576	1.53892	5.2608	8.47724e-06
MT2703	15.0446	9.71016	31.3567	25.2051	2.27796	1.18774	4.07385	0.00241373
MT2705	65.6162	74.1158	127.745	156.114	2.03167	1.02267	6.3422	0.00160728		archease
MT2723	19.3344	15.4756	40.6956	30.0164	2.02967	1.02124	4.67719	0.0419325		hypothetical protein
MT2726	6.16285	12.1377	22.8359	38.4181	3.35553	1.74654	3.77108	0.000784469
MT2727	33.654	74.9503	133.062	175	2.83824	1.505	6.22616	0.00325757		major capsid protein
MT2728	77.7003	106.281	289.572	248.892	2.92737	1.54961	7.09794	0.000107838		prophage protease
MT2729	12.6278	25.8685	63.8723	60.2482	3.23096	1.69196	4.81251	9.38647e-05
MT2736.1	9.24428	18.0548	62.7816	31.5962	3.46502	1.79287	4.43486	0.000234923
MT2777.1	50.1487	57.8058	110.635	125.667	2.18937	1.13052	6.21586	0.000287917		hypothetical protein
MT2834	420.343	321.953	826.454	842.039	2.24756	1.16836	8.91559	0.00110302		thymidylate synthase
MT2835	42.2337	32.6959	81.8001	71.3787	2.04263	1.03043	5.69236	0.0022553		hypothetical protein
MT2924	2.53764	0.834467	4.90801	4.23676	2.65124	1.40666	1.51136	0.0174945
MT2952	17.3406	19.8755	45.6036	40.0697	2.30353	1.20385	4.78321	0.000272169		transcriptional regulator
MT2985	87.9113	52.1921	142.809	163.295	2.18333	1.12653	6.55228	0.0043674		hypothetical protein
MT3029	43.865	43.3164	103.954	81.3602	2.12548	1.08779	5.97478	0.00296111		hypothetical protein
MT3031	113.227	89.9707	214.316	220.599	2.13969	1.0974	7.09992	0.000775353		glycosyltransferase
MT3034	117.215	47.7163	211.522	176.077	2.34901	1.23205	6.85656	0.0435579		PGL/p-HBAD biosynthesis glycosyltransferase
MT3044	10.3318	9.48258	25.4944	17.8806	2.18748	1.12927	3.7597	0.0157203		16S rRNA (guanine(966)-N(2))-methyltransferas
MT3052.2	252.677	198.831	406.819	505.898	2.02119	1.0152	8.41119	0.00299576	rpmB-3	50S ribosomal protein L28
MT3066	29.4246	16.8411	74.7108	52.78	2.75231	1.46064	5.43956	0.00842182	leuC	3-isopropylmalate dehydratase large subunit
MT3067	17.1593	10.5446	76.1423	45.1682	4.37128	2.12806	5.06578	0.000187665		transcriptional regulator
MT3068	357.808	331.587	749.766	973.019	2.49887	1.32127	8.7459	8.08391e-05		hypothetical protein
MT3080.1	83.8631	51.8887	134.766	138.808	2.01366	1.00982	6.4589	0.0043674
MT3107	9.96932	10.0895	23.313	21.112	2.2143	1.14685	3.74325	0.000830934
MT3140	9.06302	7.88951	23.9947	22.6918	2.74831	1.45854	3.89005	3.00015e-05		NAD(P)H-dependent oxidoreductase
MT3191	2.1147	3.56545	5.04434	7.89905	2.29491	1.19844	2.08322	0.0124868
MT3192	2.77932	2.19996	6.13501	5.17029	2.25598	1.17376	1.94057	0.0118363	moaA-2	Cyclic pyranopterin monophosphate synthase 1
MT3195	1.93344	1.59307	4.22634	3.37505	2.14131	1.0985	1.32834	0.0319288		phosphatase
MT3196	2.23554	1.74479	4.29451	5.81657	2.51729	1.33187	1.6145	0.00684296		tRNA-specific adenosine deaminase
MT3212	16.7364	13.5791	32.1066	35.1867	2.2161	1.14802	4.35647	0.00150231		NAD(P)H nitroreductase
MT3215	6.34411	4.6275	13.088	10.8432	2.17263	1.11944	2.99878	0.0168494		hypothetical protein
MT3221	663.352	187.755	1472.61	1162.88	3.09633	1.63056	9.51535	0.0488377		PPE family protein
MT3249	56.7949	83.0674	118.474	165.521	2.031	1.02219	7.07249	0.0357414		TetR family transcriptional regulator
MT3261	64.5891	55.9093	125.836	133.35	2.15021	1.10447	6.37343	0.00108208
MT3263	3.32311	1.97238	6.20318	8.68895	2.77763	1.47385	2.65056	0.0015997		short-chain dehydrogenase/reductase
MT3264	5.25655	5.0068	12.6109	11.2023	2.31683	1.21215	3.2564	0.000913869		amidase
MT3266	5.61907	3.03443	10.5659	9.40705	2.28902	1.19473	2.85529	0.0143021		peroxidase
MT3267	0.543781	1.06205	3.13567	3.30324	4.06624	2.02369	1.16016	0.000562228
MT3275	3.26269	5.91713	12.8835	11.4177	2.66344	1.41329	2.68704	0.00249586		transcriptional regulator
MT3275.1	2.1147	2.95857	4.43084	6.39105	2.14215	1.09906	1.8274	0.024882
MT3387	43.2004	59.7023	130.403	95.2913	2.19434	1.13379	6.06817	0.00442589
MT3413	41.6295	20.9375	119.019	113.172	3.7077	1.89053	6.47705	0.00249586		pilin
MT3494	46.3422	52.3438	94.4792	128.754	2.26229	1.17778	5.93231	0.000559705		transposase
MT3494.1	56.4324	84.357	140.424	173.995	2.23433	1.15984	6.38598	0.000942528		transposase
MT3505	41.0253	31.3304	117.451	123.082	3.32117	1.73169	5.87269	1.31656e-07	crtB	phytoene synthase
MT3510.1	4.22941	3.71717	8.18001	8.76076	2.12423	1.08694	2.79768	0.00796514
MT3532.2	35.1645	24.8823	88.9576	69.7271	2.64111	1.40114	5.60523	0.017808		hypothetical protein
MT3548	641.239	557.348	1415.01	1185.07	2.16924	1.11719	9.63714	0.00795112	rplM	50S ribosomal protein L13
MT3553	11.359	12.3653	37.3554	40.7878	3.29449	1.72006	4.23612	1.01106e-07		type VII secretion protein EccC
MT3554	10.0902	11.7584	27.6075	20.6811	2.21198	1.14534	3.76316	0.00684296		type VII secretion integral membrane protei
MT3562	48.3361	46.275	86.8445	116.906	2.15305	1.10638	5.9721	0.00351553	truA	tRNA pseudouridine(38-40) synthase TruA
MT3563	327.175	241.464	488.619	662.874	2.02472	1.01772	8.52064	0.00442589	rplQ	50S ribosomal protein L17
MT3564	355.149	304.58	579.758	750.625	2.01642	1.01179	8.74425	0.00429582		DNA-directed RNA polymerase subunit alpha
MT3569	23.0805	28.4477	60.2594	54.9343	2.23726	1.16173	5.37075	0.000469803		LLM class F420-dependent oxidoreductase
MT3573.13	2.05428	2.57926	10.1569	11.9204	4.77718	2.25616	2.28761	7.54998e-09
MT3573.14	11.5402	11.3791	46.7624	57.3758	4.54021	2.18276	4.45152	3.73162e-11
MT3575	17.401	9.6343	31.2886	25.4206	2.09268	1.06535	4.0603	0.0459923	bphI-1	4-hyroxy-2-oxovalerate aldolase
MT3576	17.2802	9.78602	28.3574	26.9286	2.03653	1.02611	4.23602	0.0243167		acetolactate synthase
MT3581	140.235	149.066	320.452	302.964	2.15497	1.10766	7.6927	0.000437975		PE family protein PE31
MT3623	64.8912	52.3438	134.289	128.18	2.23777	1.16206	6.4054	0.000522035		acetyl-CoA acetyltransferase
MT3759	4.41067	7.73779	15.133	13.2848	2.35316	1.2346	2.89811	0.00270691		conjugal transfer protein
MT3760	4.59193	10.8481	31.2886	22.6918	3.51474	1.81342	3.64384	9.50264e-05
MT3874	54.076	35.7304	140.083	109.438	2.77677	1.47341	6.55949	0.00228896		SAM-dependent methyltransferase
MT3931	166.88	91.7155	466.465	497.856	3.7277	1.89829	8.22004	5.21632e-06		transporter mmpL8
MT3932	126.157	69.8677	442.13	529.595	4.95475	2.30881	8.11689	1.34906e-08		acyltransferase PapA1
MT3933	684.439	339.78	1927.89	2000.25	3.83499	1.93922	10.3575	0.000263956	mas-3	phthioceranic/hydroxyphthioceranic aci
MT3934	127.426	107.115	227.064	304.903	2.26759	1.18116	7.44931	0.000384607
MT3978	781.051	688.132	1502.8	1699.01	2.17927	1.12385	10.0097	0.00539577		ESX-1 secretion-associated protein EspE
MT3997	174.493	141.328	407.228	410.607	2.58903	1.37241	7.7902	8.52437e-06		type VII secretion protein EccE
MT3998	173.406	185.176	456.786	430.642	2.47488	1.30736	8.02547	2.76276e-05		membrane-anchored mycosin

## Sheet: 2C, Down>2x, p<0.05
Supplemental Dataset 2C: Downregulated gene expression tables of DosR mutant treated HC106A compared to DMSO
Gene	Counts per million (CPM)				DosR DMSO/DosR HC106A
	DosR_DMSO1	DosR_DMSO2	DosR_HC106A1	DosR_HC106A2	Fold change	log2 Fold change	logCPM	Adjusted p-value	Gene name	Annotated function
MT0077	23.8659	25.9443	11.6539	12.3138	0.48132	-1.05493	4.21895	0.0102088		maturase
MT0356	916.754	495.067	231.165	194.86	0.30176	-1.72853	8.50344	6.77778e-06		hypothetical protein
MT0808	103.56	210.968	67.8942	55.3039	0.391955	-1.35124	6.48349	0.00162348		DUF2334 domain-containing protein
MT1029	137.758	209.755	81.5774	88.2846	0.488907	-1.03237	7.17774	0.00442507		alpha-ketoglutarate-dependent dioxygenase AlkB
MT1063	3.80647	5.46197	2.49313	1.36819	0.425343	-1.2333	2.33021	0.027516
MT1296	776.398	441.054	211.162	165.12	0.309089	-1.69391	8.50637	1.85959e-05		oxidoreductase
MT1297	370.194	173.114	35.7155	36.5812	0.133059	-2.90986	7.02527	2.04487e-14	tap	multidrug-efflux transporter
MT1315	325	647.926	186.868	264.998	0.464449	-1.10641	8.47393	0.0403284		hypothetical protein
MT1422	436.112	1467.37	313.09	396.56	0.37283	-1.42341	9.52452	0.0340197		HNH endonuclease
MT1576	76.0689	128.204	42.2092	59.4085	0.497455	-1.00736	6.17527	0.023095		hypothetical protein
MT1690	215.398	557.652	129.237	133.651	0.340115	-1.5559	7.88748	0.00592169	argC	N-acetyl-gamma-glutamyl-phosphate reductase
MT1691	185.308	386.965	125.526	113.344	0.417496	-1.26017	7.57048	0.0307629	argJ	bifunctional glutamate N-acetyltransferase/amino
MT1692	212.558	400.392	96.2463	99.3021	0.319084	-1.64799	7.52069	0.000187463	argB	acetylglutamate kinase
MT1693	155.401	388.558	100.189	95.1976	0.35928	-1.47682	7.43653	0.00900828	argD	aspartate aminotransferase family protein
MT1694	127.668	211.651	61.5164	87.2764	0.438496	-1.18936	6.83228	0.0305282	argF	ornithine carbamoyltransferase
MT2042	389.951	204.293	128.947	143.732	0.458762	-1.12418	7.56848	0.00676292		23S rRNA (adenine(2058)-N(6))-methyltransferas
MT2166	103.077	103.55	34.0341	47.7428	0.395487	-1.3383	6.32586	7.02587e-05		PE family protein
MT2433	145.129	246.32	77.2869	92.5332	0.433871	-1.20466	7.50876	0.011899		GTPase Era
MT2435	220.231	383.324	133.933	137.972	0.450566	-1.15019	8.0786	0.0313835		hypothetical protein
MT2488.1	39.4543	22.303	11.48	7.63309	0.310007	-1.68963	4.53811	0.000437638
MT2489	329.35	193.9	53.5152	47.9588	0.193954	-2.36622	7.12639	3.96256e-13		hypothetical protein
MT2512	19.5761	17.9031	8.98685	7.56108	0.442292	-1.17693	4.03377	0.00369853		hypothetical protein
MT2669	97.216	265.816	57.2839	80.0754	0.378411	-1.40198	7.06514	0.011772	ruvB	Holliday junction branch migration DNA helicas
MT2670	50.2695	122.97	33.3383	34.925	0.394311	-1.3426	6.0402	0.00790594	ruvA	Holliday junction branch migration protein RuvA
MT2733	6.34411	13.048	3.4208	3.67252	0.367367	-1.44471	3.3089	0.0147931		hypothetical protein
MT2754	183.617	299.725	91.26	104.055	0.404143	-1.30706	7.37468	0.0006397		membrane protein
MT2793	879.052	1488.77	558.228	467.058	0.433034	-1.20745	9.82771	0.0208696	lexA	LexA repressor
MT2797	1063.76	703.456	350.313	397.857	0.423336	-1.24012	9.12331	0.00190306	hflX	ATP-binding protein
MT2914	61.2056	128.887	35.7155	45.1504	0.425504	-1.23275	6.1466	0.0393825	cobB	hydrogenobyrinate a,c-diamide synthase
MT2916	295.394	521.618	196.145	198.028	0.482517	-1.05135	8.18483	0.0313835		hypothetical protein
MT2986	143.196	214.61	76.8231	96.2057	0.483603	-1.04811	7.40363	0.0446226	glnD	uridylyltransferase
MT3159	183.617	473.219	120.424	120.401	0.366725	-1.44723	7.87315	0.00276705		HNH endonuclease
MT3168	214.431	313.835	71.0251	79.0673	0.284149	-1.81528	6.86909	1.46284e-08		FAD-containing monooxygenase MymA
MT3169	43.5629	78.0606	19.7711	18.0746	0.311586	-1.6823	4.79501	5.19875e-05	bah	acetylhydrolase
MT3170	56.7949	91.9431	15.7705	16.7064	0.218501	-2.19429	4.98244	1.31002e-09		acetoin dehydrogenase
MT3290.1	119.994	48.5508	39.0203	24.5555	0.37732	-1.40614	5.89878	0.0106361		transcriptional regulator
MT3326	325.544	202.017	35.6575	34.781	0.133529	-2.90477	7.8522	8.29652e-17		stearoyl-CoA 9-desaturase
MT3327	167.907	115.232	40.4118	23.9074	0.227409	-2.13664	7.19549	8.11472e-08		stearoyl-CoA 9-desaturase electron transfe
MT3456.1	14.6217	11.5308	5.56605	6.48092	0.459394	-1.1222	3.40023	0.0106361
MT3573.2	6.22327	17.0686	4.0006	4.82469	0.380056	-1.39572	3.26327	0.0453537		hypothetical protein
MT3846	299.865	212.182	119.67	58.0403	0.347201	-1.52616	7.57784	0.00211775

## Sheet: 2D, Up>2x, p<0.05
Supplemental Dataset 2D: Upregulated gene expression tables of DosR mutant treated with HC106A compared to DMSO
Gene	Counts per million (CPM)				DosR DMSO/DosR HC106A
	DosR_DMSO1	DosR_DMSO2	DosR_HC106A1	DosR_HC106A2	Fold change	log2 Fold change	logCPM	Adjusted p-value	Gene name	Annotated function
MT0074	19.9991	21.3927	66.2128	110.248	4.26105	2.09121	5.44736	2.19643e-09		short-chain dehydrogenase
MT0082	49.8466	53.33	97	119.105	2.09423	1.06642	6.86142	0.00229922		hypothetical protein
MT0083	57.9429	127.977	283.173	407.578	3.71637	1.89389	8.8347	0.00051677		oxidoreductase
MT0105	15.4675	10.6205	26.0909	29.2362	2.1139	1.07991	4.195	0.00948342		hypothetical protein
MT0150	13.7758	15.248	24.8733	42.054	2.30381	1.20402	4.26471	0.00665687		hypothetical protein
MT0153	341.011	408.13	1328.6	1121.92	3.27124	1.70984	9.2609	3.0382e-06		TetR family transcriptional regulator
MT0154	164.041	193.672	945.359	937.285	5.26341	2.396	8.61672	8.58058e-16		SAM-dependent methyltransferase
MT0167	102.895	101.198	203.219	237.706	2.16008	1.11108	7.09743	0.000543515
MT0258	1092.76	1616.67	10296.6	21086.9	11.5831	3.53395	12.2469	1.09447e-07		acyl-CoA dehydrogenase FadE5
MT0265	309.653	308.146	619.687	1063.74	2.72471	1.4461	8.7707	0.00134907
MT0342	16.7364	14.3377	37.8027	36.8692	2.39986	1.26295	5.60023	0.000210777		cytochrome P450 Cyp135A1
MT0483	676.041	1083.14	3452.4	3385.85	3.88728	1.95876	10.5765	3.33954e-05	aceA-1	isocitrate lyase
MT0484	136.006	138.749	383.246	345.145	2.6511	1.40659	7.66045	5.43613e-06		3-hydroxybutyryl-CoA dehydrogenase
MT0491	92.9865	115.915	165.242	290.633	2.18214	1.12574	7.00362	0.00685293		transcriptional regulator
MT0493	1083.7	1412.22	3145.75	7124.41	4.11477	2.04081	11.1088	0.000717853		hypothetical protein
MT0585	790.597	547.486	2041.41	2142.88	3.12692	1.64474	9.93817	9.34566e-05		hypothetical protein
MT0586	40.3002	46.8819	6122.77	5468.46	132.96	7.05485	10.5478	1.39839e-51		SAM-dependent methyltransferase
MT0677	1.32924	2.57926	5.62403	3.96056	2.49353	1.31819	1.6968	0.0218812		hypothetical protein
MT0683	193.405	306.856	361.967	703.468	2.12983	1.09074	8.13912	0.0305282		carotenoid cleavage oxygenase
MT0701	299.805	317.022	647.923	995.47	2.66415	1.41368	8.70343	9.24897e-05		acyl-CoA dehydrogenase
MT0702	56.4324	70.1711	120.598	199.612	2.52917	1.33867	6.33728	0.000728449		enoyl-CoA hydratase
MT0704	39.8169	56.6679	108.364	190.539	3.09857	1.6316	6.20099	3.12463e-05		enoyl-CoA hydratase
MT0719.2	149.54	261.34	320.512	675.024	2.42309	1.27685	8.06997	0.0127613		mycofactocin precursor
MT0738	199.386	190.562	446.849	351.41	2.04713	1.0336	8.12956	0.00276705	atsA	arylsulfatase AtsA
MT0835	3.20227	3.48959	9.27675	11.3056	3.0713	1.61885	2.62863	7.73872e-05
MT0836	19.5157	26.3236	70.8512	75.4667	3.19452	1.6756	5.41979	1.0228e-05		hypothetical protein
MT0851	74.3772	67.4401	140.195	161.087	2.12373	1.0866	6.56086	0.00162348		SAM-dependent methyltransferase
MT0882	779.842	1195.49	2881.94	4258.25	3.61473	1.85389	10.5929	0.000209017		acetyl-CoA acetyltransferase
MT0883	1173.18	1816.63	3916.82	5434.83	3.12786	1.64518	11.094	0.00283623		3-hydroxyacyl-CoA dehydrogenase
MT1066	283.068	228.947	489.059	562.256	2.05299	1.03773	8.27508	0.00360992
MT1218	435.689	276.664	951.157	670.92	2.27691	1.18708	9.82461	0.0276974
MT1219	210.262	166.287	674.883	535.972	3.21533	1.68497	9.19834	1.11903e-05		acyltransferase
MT1220	121.867	76.1641	269.432	167.856	2.20761	1.14249	7.95244	0.0146983		transporter MmpL10
MT1221	74.9814	54.0128	215.105	102.111	2.45882	1.29797	7.69109	0.0114403		PE-PPE domain-containing protein
MT1236	74.2563	45.8198	127.961	123.57	2.09315	1.06568	6.19618	0.011899		ESAT-6-like protein EsxL
MT1303	396.114	393.868	2427.67	2806.02	6.62492	2.7279	9.802	5.08446e-12		hypothetical protein
MT1385	36.8563	37.1717	97.2319	71.2181	2.27595	1.18647	5.81277	0.00442507
MT1514	251.952	323.318	610.236	828.622	2.50126	1.32266	8.59136	0.000496218		acyl-CoA dehydrogenase
MT1515	65.7371	86.4811	109.929	221.288	2.17579	1.12154	6.53185	0.0208696		metal-transporting ATPase
MT1569	1.8126	2.1241	6.72564	4.03257	2.75042	1.45965	2.3359	0.00655881		hypothetical protein
MT1608	23.6243	19.7996	214.119	281.344	11.3948	3.5103	6.44868	6.35242e-30		hypothetical protein
MT1729	55.0427	56.1369	91.4339	171.456	2.36354	1.24095	6.15559	0.00276705		hypothetical protein
MT1887	28.0954	28.7512	46.6736	69.994	2.05085	1.03622	5.26786	0.00860855		antitoxin
MT1904	266.271	540.279	1577.51	1622.1	3.96738	1.98819	9.39091	1.63906e-05		oxidoreductase
MT1905	82.2922	82.3847	208.959	257.653	2.83304	1.50235	6.86382	1.94462e-06		molybdate-binding protein
MT1906	8.45882	7.20676	18.2636	18.8667	2.36394	1.24119	3.343	0.0010439		molybdenum ABC transporter permease
MT1924.1	26.464	41.8751	226.237	104.559	4.84515	2.27654	6.85793	9.84016e-08
MT2114	95.2221	81.8536	159.676	230.937	2.20493	1.14073	6.80834	0.00119867		membrane protein FxsA
MT2386	35.7083	35.5028	79.896	85.4042	2.32071	1.21457	5.6517	0.000218598		AsnC family transcriptional regulator
MT2445.1	34.4999	44.2268	128.831	109.456	3.02821	1.59846	6.37313	6.29899e-05	mbtH	protein mbtH
MT2448	201.622	213.548	461.808	421.404	2.12742	1.08911	8.50525	0.00291124		non-ribosomal peptide synthetase
MT2449	41.6295	36.0338	125.236	121.049	3.16948	1.66425	6.36669	1.20713e-07		polyketide synthase
MT2450	24.6514	27.9167	84.8243	84.6841	3.22549	1.68952	5.88939	3.21229e-07		polyketide synthase
MT2451	67.7309	86.026	311.235	195.868	3.29919	1.72211	7.53347	6.28692e-06	pchE	phenyloxazoline synthase MbtB
MT2452	14.2591	14.3377	42.673	28.6601	2.4962	1.31973	4.78695	0.000481917	entE	2,3-dihydroxybenzoate-AMP ligase
MT2454	9.78806	11.6825	40.8757	30.1003	3.31095	1.72724	4.9195	3.97118e-06		salicylate synthase
MT2466	456.051	229.403	1225.86	862.755	3.04671	1.60725	9.21781	0.000877345		hypothetical protein
MT2580	28.4579	31.027	86.9115	154.462	4.05646	2.02022	5.80424	4.54393e-07		AMP-binding protein
MT2581	102.593	175.314	240.21	321.238	2.0207	1.01486	7.52049	0.0266407		TetR family transcriptional regulator
MT2667	230.14	269.078	729.5	502.632	2.46835	1.30355	8.73493	0.000647264		oxidoreductase
MT2676	31.2372	40.0544	68.2421	111.4	2.51982	1.33332	5.74787	0.00498282		antitoxin VapB41
MT2677	30.1496	40.7372	58.9073	92.6772	2.13856	1.09664	5.59569	0.0427341		ribonuclease VapC41
MT2708	47.4902	44.9854	72.6485	119.537	2.07686	1.05441	5.85976	0.0100523		hypothetical protein
MT2709	182.469	227.354	384.115	744.442	2.75371	1.46137	8.24029	0.000892241		hypothetical protein
MT2796	263.19	257.699	817.977	1264.21	3.99711	1.99896	8.82152	1.36955e-08		acyl-CoA dehydrogenase
MT3042	11.2986	9.33086	20.1769	25.7077	2.21727	1.14879	4.14437	0.00360992
MT3058.2	1.8126	4.09647	17.9737	4.39263	3.80854	1.92924	2.82344	0.0340197
MT3263	3.32311	1.97238	8.69695	10.6575	3.60681	1.85072	2.65056	6.92118e-05		short-chain dehydrogenase/reductase
MT3264	5.25655	5.0068	13.1034	13.0339	2.54228	1.34613	3.2564	0.000370695		amidase
MT3267	0.543781	1.06205	3.76868	2.01629	3.68743	1.88262	1.16016	0.00376231
MT3413	41.6295	20.9375	188.84	49.6871	3.81004	1.9298	6.47705	0.00498282		pilin
MT3425	16.5551	18.7376	31.1931	43.5662	2.11743	1.08232	4.75759	0.00558778	moaC-3	moaC
MT3426	15.0446	20.1789	31.8888	43.4942	2.14114	1.09838	4.61707	0.0146983		pterin-4-alpha-carbinolamine dehydratase
MT3427	57.3387	85.0398	128.425	280.984	2.87567	1.5239	6.70968	0.00190306	moaA-3	Cyclic pyranopterin monophosphate synthase 3
MT3462	31.1768	46.7302	88.6509	124.434	2.73668	1.45243	5.82272	7.05213e-05
MT3510	24.5306	21.8479	64.1835	39.9657	2.24588	1.16728	5.41502	0.00558778		hypothetical protein
MT3510.1	4.22941	3.71717	10.1464	7.56108	2.22653	1.1548	2.79768	0.0100523
MT3537	12.8091	12.3653	22.3802	31.6845	2.14378	1.10016	4.33707	0.00611181		IS256 family transposase
MT3591	114.496	56.7438	268.736	145.101	2.4159	1.27256	7.03079	0.0313835		carboxylesterase LipF
MT3720	45.2547	48.7025	95.1446	133.939	2.43759	1.28546	5.83288	0.000142698		monooxygenase
MT3762	5.98159	11.986	30.3234	35.069	3.65238	1.86884	3.95624	4.81531e-05
MT3808.1	78.4253	94.7499	139.615	238.858	2.1853	1.12783	6.71495	0.00454533		hypothetical protein
MT3874	54.076	35.7304	172.142	72.8024	2.7267	1.44716	6.55949	0.006742		SAM-dependent methyltransferase
MT3904	27.8537	19.6479	99.2612	72.8744	3.62013	1.85604	5.31675	1.48512e-05		DNA alkylation response protein
MT3931	166.88	91.7155	400.871	267.662	2.58452	1.3699	8.22004	0.00334406		transporter mmpL8
MT3932	126.157	69.8677	366.721	266.078	3.22685	1.69013	8.11689	9.39261e-05		acyltransferase PapA1
MT3933	684.439	339.78	2001.23	1179.53	3.10536	1.63476	10.3575	0.00616166	mas-3	phthioceranic/hydroxyphthioceranic aci
MT3940	7.06915	6.59988	20.061	34.5649	3.9841	1.99425	3.61713	4.12837e-07		SAM-dependent methyltransferase
MT4005	122.049	121.453	273.142	424.068	2.86276	1.51741	7.44451	3.97256e-06		ESAT-6 like protein EsxC
MT4006	526.44	765.661	1343.33	1802.49	2.43471	1.28375	9.65329	0.00437432		EsxD
